# Supplementary material for: Nano Fe and Mg2Ni derived from TMA-TM (TM = Fe, Ni) MOFs as synergetic catalysts for hydrogen storage in MgH2
Source: Royal Society of Chemistry journal article supplement (doi:10.1039/d0se00081g), 2020-01-01
Supplement: d0se00081g1.pdf [file d0se00081g1.pdf]

## Electronic Supplementary Information

### **Nano Fe and Mg<sub>2</sub>Ni derived from TMA-TM (TM=Fe, Ni) MOFs as synergetic catalysts for hydrogen storage in MgH<sub>2</sub>**

Zhewen Ma <sup>a</sup>, Qiuyu Zhang<sup>a</sup>, Wen Zhu <sup>a</sup>, Darvaish Khan <sup>a</sup>, Chuanzhu Hu <sup>a</sup>, Tianping Huang <sup>a</sup>,

Wenjiang Ding <sup>a,b,c</sup>, Jianxin Zou <sup>a,b,c,\*</sup>,

<sup>a</sup> National Engineering Research Center of Light Alloys Net Forming & State Key Laboratory of Metal Matrix Composites, Shanghai Jiao Tong University, Shanghai, 200240, PR China;

<sup>b</sup> Shanghai Engineering Research Center of Mg Materials and Applications & School of Materials Science and Engineering, Shanghai Jiao Tong University, Shanghai, 200240, PR China

<sup>c</sup> Center of Hydrogen Science, Shanghai Jiao Tong University, Shanghai, 200240, PR China

## Supplementary Figures:

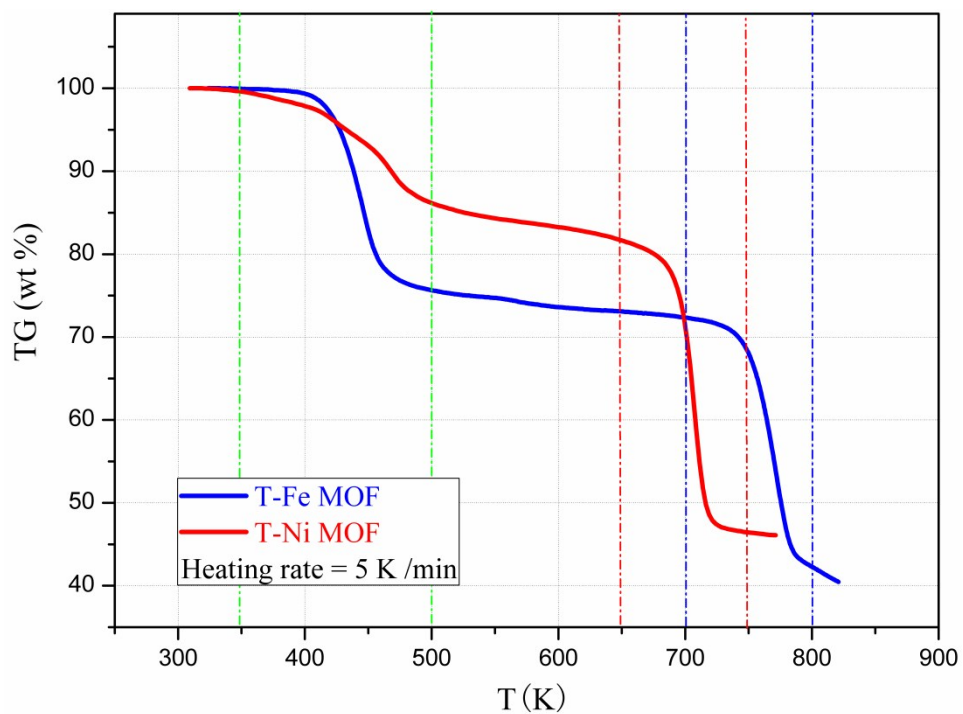

**Fig. S1.** Thermogravimetric profiles of the TMA-TM MOFs.

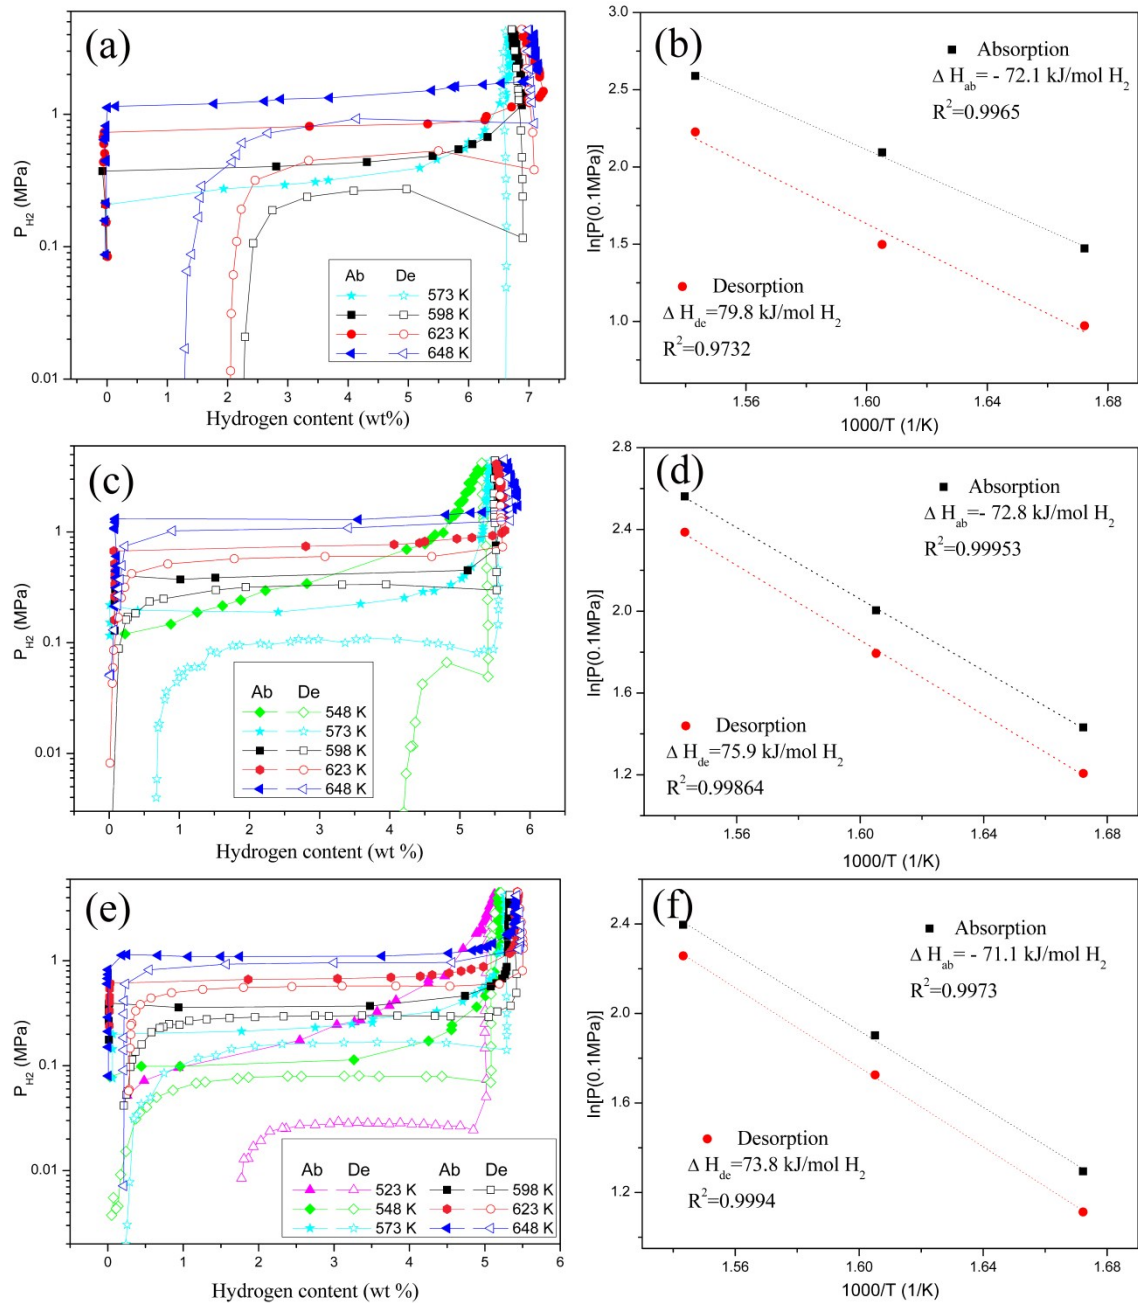

**Fig. S2.** PC isotherms and the van't Hoff plots of pure MgH<sub>2</sub> (a-b), the MgH<sub>2</sub>-Fe MOF (c-d) and the MgH<sub>2</sub>-TM MOFs (TM=Fe, Ni) (e-f) composites tested at different temperatures (Ab, absorption; De, desorption).

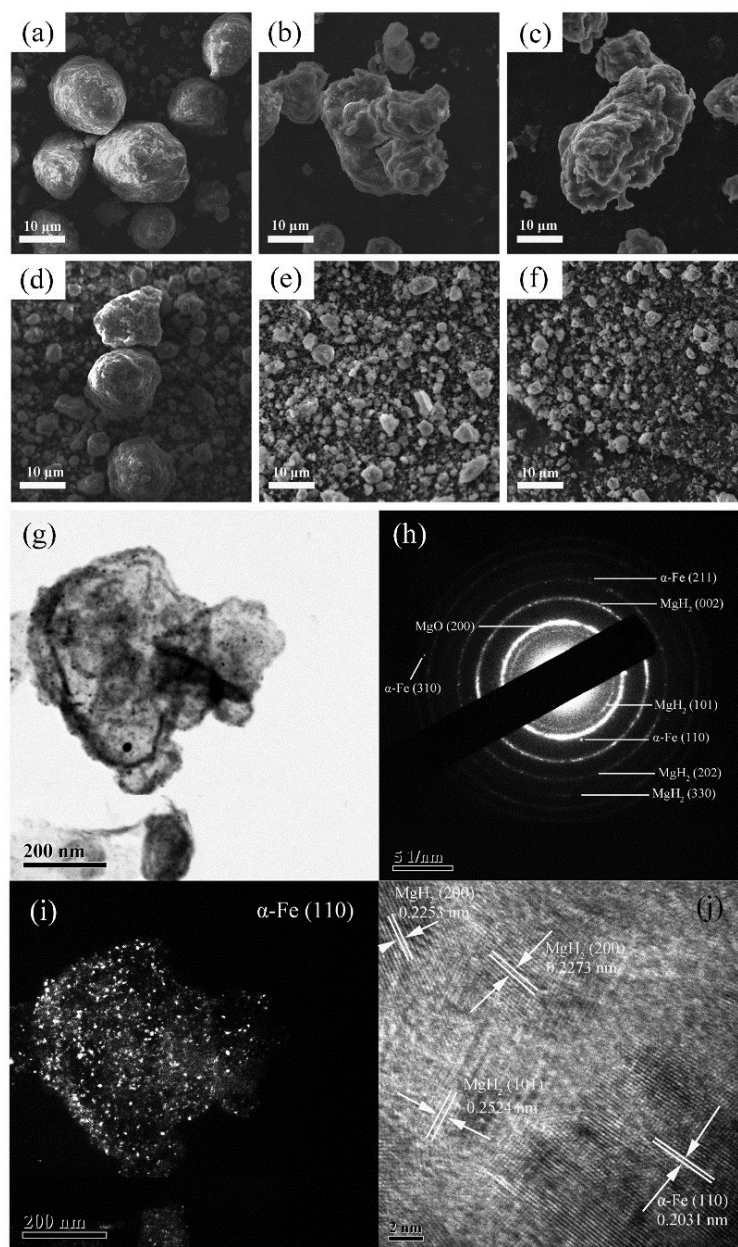

**Fig. S3.** SEM images of the as milled, rehydrogenated and dehydrogenated of pure MgH<sub>2</sub> (a-c) and MgH<sub>2</sub>-Fe MOF composites (d-f), typical bright field TEM micrographs (g), the corresponding SAED patterns (h), the dark field micrographs (i) contributed by α-Fe (110) and the HRTEM image (j) of the hydrogenated MgH<sub>2</sub>-Fe MOF composite sample.

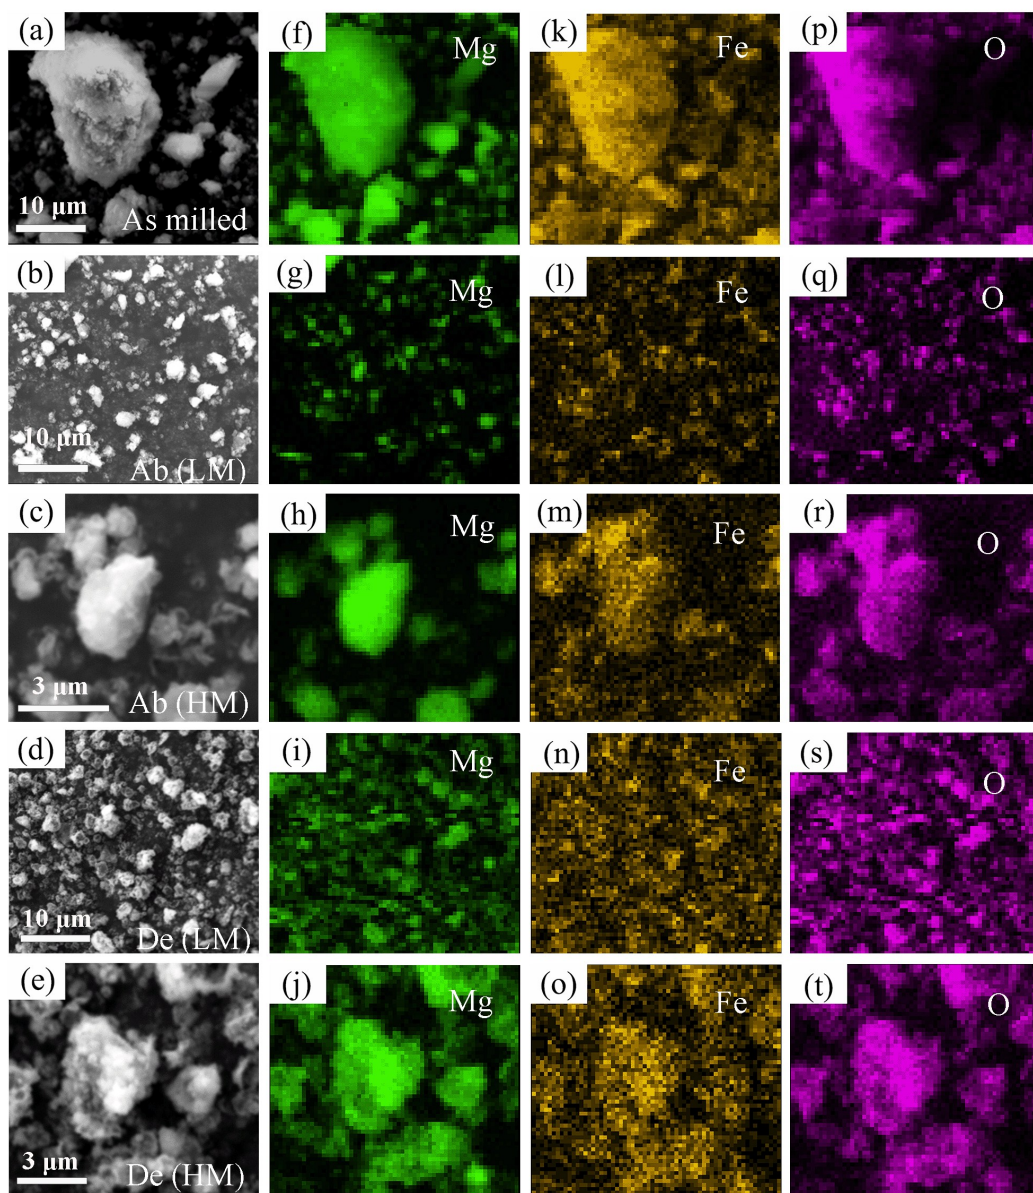

**Fig. S4.** SEM micrographs of the as milled (a), re-hydrogenated (b, c) and dehydrogenated (d, e) MgH<sub>2</sub>-Fe MOF composite in low magnification (LM) and high magnification (HM), the corresponding elemental mappings.

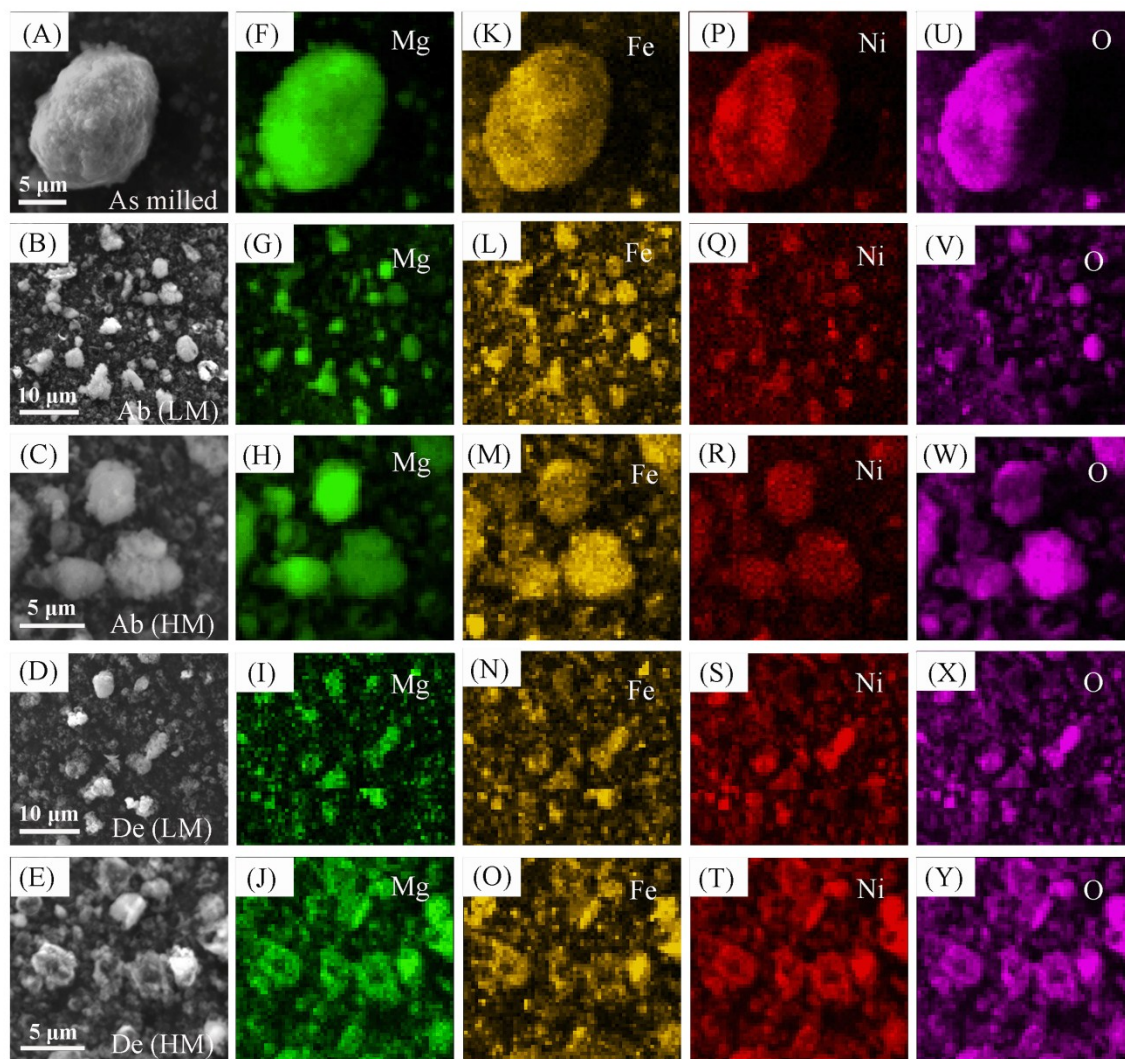

**Fig. S5.** SEM micrographs of the as milled (A), re-hydrogenated (B, C) and dehydrogenated (D, E) ternary  $\text{MgH}_2$ -TM MOFs (TM=Fe, Ni) composite in low magnification (LM) and high magnification (HM), the corresponding elemental mappings.

## Supplementary Table:

**Table S1.** Pore characteristic parameters of the TMA-TM MOFs (TM=Fe, Ni).

| Samples    | BET surface area (m <sup>2</sup> /g) | BJH pore size (nm) | Pore volume (cm <sup>3</sup> /g) |
|------------|--------------------------------------|--------------------|----------------------------------|
| TMA-Fe MOF | 1015.49                              | 3.02               | 0.5317                           |
| TMA-Ni MOF | 346.22                               | 7.40               | 0.1736                           |

**Table S2.** PCT data of the pure MgH<sub>2</sub>, MgH<sub>2</sub>-Fe MOF and ternary MgH<sub>2</sub>-TM MOFs (TM=Fe, Ni) composite samples obtained at different temperatures.

| Samples                             | Temperature (K) | Maximum H-absorption (wt %) | Reversible H <sub>2</sub> sorption capacity (wt %) | Absorption plateaus (MPa) | Desorption plateaus (MPa) |
|-------------------------------------|-----------------|-----------------------------|----------------------------------------------------|---------------------------|---------------------------|
| Pure Mg                             | 648             | 7.02                        | 5.71                                               | 1.33                      | 0.91                      |
|                                     | 623             | 6.89                        | 4.85                                               | 0.81                      | 0.48                      |
|                                     | 598             | 6.73                        | 4.51                                               | 0.41                      | 0.26                      |
|                                     | 573             | 6.68                        | —                                                  | 0.30                      | —                         |
| MgH <sub>2</sub> -Fe MOF composite  | 648             | 5.64                        | 5.63                                               | 1.29                      | 1.09                      |
|                                     | 623             | 5.52                        | 5.51                                               | 0.74                      | 0.61                      |
|                                     | 598             | 5.51                        | 5.50                                               | 0.42                      | 0.33                      |
|                                     | 573             | 5.44                        | 4.76                                               | 0.19                      | 0.11                      |
|                                     | 548             | 5.32                        | 1.13                                               | —                         | —                         |
| MgH <sub>2</sub> -TM MOFs composite | 648             | 5.42                        | 5.27                                               | 1.12                      | 0.96                      |
|                                     | 623             | 5.43                        | 5.24                                               | 0.68                      | 0.57                      |
|                                     | 598             | 5.32                        | 5.19                                               | 0.36                      | 0.30                      |
|                                     | 573             | 5.26                        | 5.07                                               | 0.23                      | 0.17                      |
|                                     | 548             | 5.19                        | 5.16                                               | 0.11                      | 0.08                      |
| 523                                 | 5.13            | 3.35                        | —                                                  | 0.03                      |                           |
